# Supplementary material for: Cesarean section without medical indication and risks of childhood allergic disorder, attenuated by breastfeeding
Source: PubMed Central journal article supplement (PMC5575109; doi:10.1038/s41598-017-10206-3), 2017-08-29
Supplement: 41598_2017_10206_MOESM1_ESM.pdf [file 41598_2017_10206_MOESM1_ESM.pdf]

**Cesarean section without medical indication and risks of childhood allergic disorder,  
attenuated by breastfeeding**

Shuyuan Chu<sup>1,2</sup>, Yunting Zhang<sup>3</sup>, Yanrui Jiang<sup>4</sup>, Wanqi Sun<sup>4</sup>, Qi Zhu<sup>4</sup>, Bin Wang<sup>1</sup>, Fan Jiang<sup>4,\*</sup>,  
Jun Zhang<sup>1,5,\*</sup>

<sup>1</sup>MOE-Shanghai Key Laboratory of Children's Environmental Health, Xinhua Hospital, School of Medicine, Shanghai Jiao Tong University, Shanghai, 200092, China

<sup>2</sup>Laboratory of Respiratory Disease, Affiliated Hospital of Guilin Medical University, Guilin, 541001, China

<sup>3</sup>Child Health Advocacy Institute, Shanghai Children's Medical Center, School of medicine, Shanghai Jiao Tong University, Shanghai, 200127, China

<sup>4</sup>Department of Developmental and Behavioral Pediatrics, Shanghai Children's Medical Center, School of medicine, Shanghai Jiao Tong University, Shanghai, 200127, China

<sup>5</sup>School of Public Health, Guilin Medical University, Guilin, 541004, China

\*Corresponding authors:

Jun Zhang, Xinhua Hospital, School of Medicine, Shanghai Jiao Tong University, Shanghai, 200092, China, Tel: +86 21 2507 8871, Email: zhangjun@xinhumed.com.cn or

Fan Jiang, Department of Developmental and Behavioral Pediatrics, Shanghai Children's Medical Center, School of medicine, Shanghai Jiao Tong University, Shanghai, 200127, China, Tel: +86 21 3862 6161, Email: fanjiang@shsmu.edu.cn

Table S1. Demographic, perinatal and child characteristics by mode of delivery including subjects excluded for absent information on delivery.

| Characteristics                      | Vaginal delivery |    | CS including in the study |    | No record on delivery or without causes of CS |    |
|--------------------------------------|------------------|----|---------------------------|----|-----------------------------------------------|----|
|                                      | No.              | %  | No.                       | %  | No.                                           | %  |
| <b>Gender (boys)</b>                 | 3541             | 53 | 3173                      | 53 | 857                                           | 56 |
| <b>Age (yrs)</b>                     |                  |    |                           |    |                                               |    |
| 5-6                                  | 304              | 5  | 361                       | 6  | 67                                            | 4  |
| 7-8                                  | 2639             | 40 | 2547                      | 43 | 702                                           | 46 |
| 9-10                                 | 2639             | 40 | 2242                      | 38 | 570                                           | 38 |
| 11-12                                | 1095             | 16 | 812                       | 14 | 180                                           | 12 |
| <b>Birth weight (g)</b>              |                  |    |                           |    |                                               |    |
| 2500-2999                            | 838              | 13 | 723                       | 12 | 186                                           | 12 |
| 3000-3499                            | 2989             | 45 | 2423                      | 41 | 629                                           | 41 |
| 3500-3999                            | 1848             | 28 | 1943                      | 33 | 405                                           | 27 |
| ≥4000                                | 515              | 8  | 735                       | 12 | 151                                           | 10 |
| <b>Newborn resuscitation</b>         | 25               | 0  | 179                       | 3  | 28                                            | 2  |
| <b>Feeding in the first 4 months</b> |                  |    |                           |    |                                               |    |
| exclusive breastfeeding              | 4492             | 67 | 3314                      | 56 | 930                                           | 61 |
| mixed feeding                        | 1341             | 20 | 1703                      | 29 | 304                                           | 20 |
| exclusive formula feeding            | 775              | 12 | 905                       | 15 | 230                                           | 15 |
| <b>Passive smoking</b>               |                  |    |                           |    |                                               |    |
| no                                   | 1835             | 27 | 1643                      | 28 | 323                                           | 21 |
| occasionally                         | 3462             | 52 | 2990                      | 50 | 837                                           | 55 |
| frequently                           | 1327             | 20 | 1307                      | 22 | 354                                           | 23 |
| <b>Asthma</b>                        | 177              | 3  | 251                       | 4  | 52                                            | 3  |
| <b>Allergic rhinitis</b>             | 427              | 6  | 746                       | 13 | 208                                           | 14 |
| <b>Gestational diabetes</b>          | 80               | 1  | 223                       | 4  | 32                                            | 2  |

---

| <b>Maternal educational level (yrs)</b>   |      |    |      |    |     |    |
|-------------------------------------------|------|----|------|----|-----|----|
| ≤9                                        | 2650 | 40 | 1184 | 20 | 574 | 38 |
| 10-12                                     | 1765 | 26 | 1525 | 26 | 412 | 27 |
| 13-16                                     | 1902 | 28 | 2913 | 49 | 432 | 28 |
| ≥17                                       | 147  | 2  | 235  | 4  | 25  | 2  |
| <b>Paternal education level (yrs)</b>     |      |    |      |    |     |    |
| ≤9                                        | 2320 | 35 | 1020 | 17 | 501 | 33 |
| 10-12                                     | 2021 | 30 | 1664 | 28 | 479 | 32 |
| 13-16                                     | 1890 | 28 | 2781 | 47 | 435 | 29 |
| ≥17                                       | 292  | 4  | 410  | 7  | 50  | 3  |
| <b>Family income (10 thousand RMB/yr)</b> |      |    |      |    |     |    |
| <3.0                                      | 687  | 10 | 313  | 5  | 175 | 12 |
| 3.0-9.9                                   | 2257 | 34 | 1676 | 28 | 466 | 31 |
| 10.0-29.9                                 | 1472 | 22 | 1805 | 30 | 301 | 20 |
| ≥30.0                                     | 2089 | 31 | 2025 | 34 | 59  | 4  |

---

CS: caesarean section

Table S2. Interaction between caesarean section and breastfeeding.

| Exposure                                       | Unadjusted estimated |         | Adjusted estimated |         |
|------------------------------------------------|----------------------|---------|--------------------|---------|
|                                                | beta                 | P value | beta               | P value |
| <b>Asthma <sup>a</sup></b>                     |                      |         |                    |         |
| CS                                             | 0.29                 | <0.01   | 0.21               | 0.01    |
| Breastfeeding                                  | -0.12                | 0.70    | <0.01              | 1.00    |
| CS* Breastfeeding                              | 0.41                 | 0.18    | 0.52               | 0.09    |
| <b>Allergic rhinitis <sup>b</sup></b>          |                      |         |                    |         |
| CS                                             | 0.20                 | <0.01   | 0.13               | <0.01   |
| Breastfeeding                                  | -0.30                | 0.05    | -0.16              | 0.30    |
| CS* Breastfeeding                              | -0.11                | 0.50    | 0.02               | 0.88    |
| <b>Asthma + Allergic rhinitis <sup>c</sup></b> |                      |         |                    |         |
| CS                                             | 0.21                 | <0.01   | 0.13               | <0.01   |
| Breastfeeding                                  | -0.23                | 0.10    | -0.08              | 0.56    |
| CS* Breastfeeding                              | -0.01                | 0.94    | 0.13               | 0.41    |

a: adjusted for maternal education level, paternal education level, and maternal history of gestational diabetes.

b: adjusted for maternal education level, paternal education level, and maternal history of gestational diabetes.

c: adjusted for maternal education level, paternal education level, family income, and maternal history of gestational diabetes.

CS: caesarean section

Table S3. Interaction between caesarean section and breastfeeding.

| Model                                          |                                | Unadjusted estimated |           | Adjusted estimated |           |
|------------------------------------------------|--------------------------------|----------------------|-----------|--------------------|-----------|
|                                                |                                | OR                   | 95% CI    | OR                 | 95% CI    |
| <b>Asthma <sup>a</sup></b>                     |                                |                      |           |                    |           |
| OR <sub>cs</sub>                               |                                | 1.34                 | 1.15-1.57 | 1.24               | 1.05-1.46 |
| OR <sub>breastfeeding</sub>                    |                                | 0.88                 | 0.47-1.65 | 1.00               | 0.54-1.87 |
| OR <sub>cs</sub> =1 and                        | OR <sub>cs</sub> =1,           |                      |           |                    |           |
| OR <sub>breastfeeding</sub> =1                 | OR <sub>breastfeeding</sub> =0 | 2.02                 | 0.96-4.25 | 2.08               | 0.98-4.42 |
|                                                | OR <sub>cs</sub> =0,           |                      |           |                    |           |
|                                                | OR <sub>breastfeeding</sub> =1 | 1.32                 | 0.39-4.46 | 1.68               | 0.50-5.68 |
| <b>Allergic rhinitis <sup>b</sup></b>          |                                |                      |           |                    |           |
| OR <sub>cs</sub>                               |                                | 1.23                 | 1.14-1.32 | 1.13               | 1.05-1.22 |
| OR <sub>breastfeeding</sub>                    |                                | 0.74                 | 0.56-1.00 | 0.86               | 0.63-1.15 |
| OR <sub>cs</sub> =1 and                        | OR <sub>cs</sub> =1,           |                      |           |                    |           |
| OR <sub>breastfeeding</sub> =1                 | OR <sub>breastfeeding</sub> =0 | 1.10                 | 0.75-1.62 | 1.16               | 0.78-1.72 |
|                                                | OR <sub>cs</sub> =0,           |                      |           |                    |           |
|                                                | OR <sub>breastfeeding</sub> =1 | 0.67                 | 0.37-1.22 | 0.88               | 0.47-1.62 |
| <b>Asthma + Allergic rhinitis <sup>c</sup></b> |                                |                      |           |                    |           |
| OR <sub>cs</sub>                               |                                | 1.24                 | 1.15-1.32 | 1.14               | 1.06-1.22 |
| OR <sub>breastfeeding</sub>                    |                                | 0.79                 | 0.60-1.05 | 0.92               | 0.69-1.22 |
| OR <sub>cs</sub> =1 and                        | OR <sub>cs</sub> =1,           |                      |           |                    |           |
| OR <sub>breastfeeding</sub> =1                 | OR <sub>breastfeeding</sub> =0 | 1.22                 | 0.84-1.77 | 1.30               | 0.89-1.90 |
|                                                | OR <sub>cs</sub> =0,           |                      |           |                    |           |
|                                                | OR <sub>breastfeeding</sub> =1 | 0.78                 | 0.44-1.40 | 1.05               | 0.58-1.90 |

a: adjusted for maternal education level, paternal education level, and maternal history of gestational diabetes.

b: adjusted for maternal education level, paternal education level, and maternal history of gestational diabetes.

c: adjusted for maternal education level, paternal education level, family income, and maternal history of gestational diabetes.

CS: caesarean section
